# Supplementary material for: An intranasal adjuvanted, recombinant influenza A/H5 vaccine candidate induces broad priming against diverse influenza A/H5N1 virus clades in a phase I randomized trial in healthy adults
Source: Research Square preprint supplement (doi:10.21203/rs.3.rs-6059149/v1), 2025-03-05
Supplement: Supplementary file 1 [file fa5e7e674040646741fa3276.docx]

**ONLINE SUPPLEMENT**

**TITLE:** An intranasal adjuvanted, recombinant influenza A/H5 vaccine candidate induces broad priming against diverse influenza A/H5N1 virus clades in a phase I randomized trial in healthy adults

**Supplemental Table 1. Solicited or unsolicited adverse events within 60 minutes and within seven days of intranasal vaccinations by group**

| **Vaccine allocation** | **Group A** | **Group B** | **Group C** | **Group D** | **Group E** |
| --- | --- | --- | --- | --- | --- |
| Day 1 and 29 | Low-Dose rH5-NE  (clade 2.1) | Med-Dose rH5-NE  (clade 2.1) | High-Dose rH5-NE  (clade 2.1) | Unadjuvanted rH5  (clade 2.1) | Placebo |
| **Dose 1** |  |  |  |  |  |
| Participants, n= | 8 | 8 | 8 | 8 | 8 |
| Participants reporting solicited or unsolicited adverse events within 60 minutes of first intranasal vaccination |  |  |  |  |  |
| Any events, n (%) | 8 (100.0) | 7 (87.5) | 8 (100.0) | 3 (37.5) | 3 (37.5) |
| Any Grade 2 events, n (%) | 1 (12.5) | 0 (0.0) | 1 (12.5) | 1 (12.5) | 0 (0.0) |
| Participants reporting solicited or unsolicited adverse events within seven days of first intranasal vaccination (including events within 60 minutes) |  |  |  |  |  |
| Any events, n (%) | 8 (100.0) | 7 (87.5) | 8 (100.0) | 5 (62.5) | 6 (75.0) |
| Any Grade 2 events, n (%) | 1 (12.5) | 1 (12.5) | 3 (37.5) | 2 (25.0) | 0 (0.0) |
| **Dose 2** |  |  |  |  |  |
| Participants, n= | 8 | 8 | 8 | 8 | 7 |
| Participants reporting solicited or unsolicited adverse events within 60 minutes of second intranasal vaccination |  |  |  |  |  |
| Any events, n (%) | 8 (100.0) | 8 (100.0) | 8 (100.0) | 2 (25.0) | 3 (42.9) |
| Any Grade 2 events, n (%) | 1 (12.5) | 0 (0.0) | 0 (0.0) | 0 (0.0) | 0 (0.0) |
| Participants reporting solicited or unsolicited adverse events within seven days of second intranasal vaccination (including events within 60 minutes) |  |  |  |  |  |
| Any events, n (%) | 8 (100.0) | 8 (100.0) | 8 (100.0) | 5 (62.5) | 5 (62.5) |
| Any Grade 2 events, n (%) | 1 (12.5) | 2 (25.0) | 0 (0.0) | 1 (12.5.0) | 0 (0.0) |

Adverse event severity grading was based on standardized assessments recommended by the FDA. Event severity was assessed as either Grade 1 (mild), Grade 2 (moderate), Grade 3 (severe), or Grade 4 (life threatening). After the first intranasal vaccination, participants reported the following Grade 2 unsolicited AEs: COVID-19 and arthralgia, each considered unrelated to study product. After the second intranasal vaccination, participants reported the following Grade 2 unsolicited AEs: COVID-19, oral herpes, bronchitis (with onset 23 days after vaccination), anemia, and two participants with urinary tract infections, each considered unrelated to study product. There were no solicited or unsolicited adverse events of severity Grade 3 or higher within seven days of intranasal vaccination.

**Supplemental Table 2. Unsolicited adverse events, laboratory abnormalities, and medically attended adverse events after intranasal vaccination by group**

| **Vaccine allocation** | **Group A** | **Group B** | **Group C** | **Group D** | **Group E** |
| --- | --- | --- | --- | --- | --- |
| Day 1 and 29 | Low-Dose rH5-NE  (clade 2.1) | Med-Dose rH5-NE  (clade 2.1) | High-Dose rH5-NE  (clade 2.1) | Unadjuvanted rH5  (clade 2.1) | Placebo |
| Participants reporting unsolicited adverse events within 28 days of any intranasal vaccination |  |  |  |  |  |
| Participants, n= | 8 | 8 | 8 | 8 | 8 |
| Any events, n (%) | 3 (37.5%) | 4 (50.0%) | 5 (62.5%) | 6 (75.0%) | 4 (50.0%) |
| Any Grade 2 events, n (%) | 0 (0.0%) | 1 (12.5%) | 1 (12.5%) | 3 (37.5%) | 1 (12.5%) |
| Participants reporting any medically attended adverse events within 28 days of any intranasal vaccination |  |  |  |  |  |
| Participants, n= | 8 | 8 | 8 | 8 | 8 |
| Any medically attended events, n (%) | 0 (0.0%) | 1 (12.5%) | 1 (12.5%) | 2 (25.0%) | 0 (0.0%) |
| Any Grade 2 events, n (%) | 0 (0.0%) | 1 (12.5%) | 0 (0.0%) | 2 (25.0%) | 0 (0.0%) |
| Participants with any laboratory abnormality within seven days of first intranasal vaccination |  |  |  |  |  |
| Participants, n= | 8 | 8 | 8 | 8 | 8 |
| Any laboratory abnormality, n (%) | 4 (50.0) | 4 (50.0%) | 5 (62.5%) | 3 (37.5%) | 5 (62.5%) |
| Any Grade 2 or higher laboratory abnormality, n (%) | 1 (12.5%) | 0 (0.0%) | 0 (0.0%) | 1 (12.5%) | 0 (0.0%) |
| Participants with any laboratory abnormality within 14 days of second intranasal vaccination |  |  |  |  |  |
| Participants, n= | 8 | 8 | 8 | 8 | 7 |
| Any laboratory abnormality, n (%) | 4 (50.0%) | 1 (12.5%) | 2 (25.0%) | 1 (12.5%) | 0 (0.0%) |
| Any Grade 2 or higher laboratory abnormality, n (%) | 0 (0.0%) | 0 (0.0%) | 0 (0.0%) | 0 (0.0%) | 0 (0.0%) |

Adverse event severity grading was based on standardized assessments recommended by the FDA. Event severity was assessed as either Grade 1 (mild), Grade 2 (moderate), Grade 3 (severe), or Grade 4 (life threatening). There were no unsolicited adverse events or laboratory abnormalities of severity Grade 3 or higher during the time period.

**Supplemental Table 3. Unsolicited adverse events**

| **Group** | **Days post-vaccination**  **#1/#2/#3** | **AE term (MedDRA preferred term)** | **Immediate reaction** | **MAAE** | **Severity** | **Relation to vaccine** |
| --- | --- | --- | --- | --- | --- | --- |
| D | 16 | COVID-19 | No | No | Grade 2 | Not Related |
| A | 70/42 | Malpositioned teeth | No | Yes | Grade 1 | Not Related |
| D | 37/9 | COVID-19 | No | No | Grade 1 | Not Related |
| E | 0 | Bradycardia | Yes | No | Grade 1 | Not Related |
| **A** | **0** | **Blood pressure diastolic increased** | **Yes** | **No** | **Grade 1** | **RELATED** |
| D | 31/3 | Urinary tract infection | No | Yes | Grade 2 | Not Related |
| D | 88/60 | Oral herpes | No | Yes | Grade 2 | Not Related |
| E | 40/12 | COVID-19 | No | No | Grade 2 | Not Related |
| B | 19 | Hordeolum | No | No | Grade 1 | Not Related |
| D | 27 | Otitis externa | No | No | Grade 1 | Not Related |
| **A** | **28/0** | **Toothache** | **Yes** | **No** | **Grade 1** | **RELATED** |
| A | 21 | Animal bite | No | No | Grade 1 | Not Related |
| **E** | **36/8** | **Cough** | **No** | **No** | **Grade 1** | **RELATED** |
| D | 31/3 | Urinary tract infection | No | Yes | Grade 2 | Not Related |
| B | 201/173/5 | COVID-19 | No | No | Grade 2 | Not Related |
| D | 8 | COVID-19 | No | No | Grade 1 | Not Related |
| B | 32/4 | Upper respiratory tract infection | No | No | Grade 1 | Not Related |
| **A** | **36/8** | **Upper-airway cough syndrome** | **No** | **No** | **Grade 1** | **RELATED** |
| C | 19 | COVID-19 | No | No | Grade 1 | Not Related |
| **C** | **0** | **Sinus pain** | **Yes** | **No** | **Grade 1** | **RELATED** |
| B | 16 | COVID-19 | No | No | Grade 1 | Not Related |
| C | 208/180/12 | Hypersensitivity | No | Yes | Grade 2 | Not Related |
| B | 51/23 | Bronchitis | No | Yes | Grade 2 | Not Related |
| **C** | **28/0** | **Nasal discomfort** | **Yes** | **No** | **Grade 1** | **RELATED** |
| C | 80/52 | Influenza | No | Yes | Grade 1 | Not Related |
| E | 207/179/11 | Toothache | No | Yes | Grade 1 | Not Related |
| C | 0 | Arthralgia | No | No | Grade 2 | Not Related |
| C | 39/8 | Dry eye | No | Yes | Grade 1 | Not Related |
| **C** | **28/0** | **Nasal discomfort** | **Yes** | **No** | **Grade 1** | **RELATED** |
| C | 18 | COVID-19 | No | No | Grade 1 | Not Related |
| C | 181/149 | Anemia | No | Yes | Grade 2 | Not Related |
| E | 41/13 | Headache | No | No | Grade 1 | Not Related |
| E | 61/33 | Pruritus | No | Yes | Grade 1 | Not Related |

Among all subjects enrolled and vaccinated. Immediate reaction is within 60 minutes of intranasal vaccination or within 30 minutes of intramuscular vaccination. MAAE= medically attended event. All recovered without sequelae. Bold font indicates events deemed related to study vaccine by the blinded investigator.

**Supplemental Table 4. Laboratory Abnormalities**

| Group | Visit number | Clinical safety laboratory test | Value* | Severity | Related to vaccine |
| --- | --- | --- | --- | --- | --- |
| E | 4 | Total bilirubin (with normal ALT) | High | Grade 1 | Not related |
| E | 12 | Hemoglobin | Low | Grade 1 | Not related |
| A | 4 | Alkaline phosphatase | Low | Grade 1 | Not related |
| A | 7 | Alkaline phosphatase | Low | Grade 1 | Not related |
| A | 12 | ALT | High | Grade 1 | Not related |
| A | 12 | Alkaline phosphatase | Low | Grade 1 | Not related |
| E | 4 | Total bilirubin (with normal ALT) | High | Grade 1 | Not related |
| E | 12 | Alkaline phosphatase | Low | Grade 1 | Not related |
| A | 4 | Total bilirubin (with normal ALT) | High | Grade 1 | Not related |
| A | 7 | Total bilirubin (with normal ALT) | High | Grade 1 | Not related |
| B | 7 | Alkaline phosphatase | Low | Grade 1 | Not related |
| B | 12 | Alkaline phosphatase | Low | Grade 1 | Not related |
| D | 4 | Hemoglobin | Low | Grade 1 | Not related (related to study procedure) |
| D | 7 | Platelet count | High | Grade 1 | Not related |
| B | **4** | **WBC count** | **Low** | **Grade 1** | **RELATED** |
| B | 4 | Total bilirubin (with normal ALT) | Low | Grade 1 | Not related |
| B | 12 | WBC count | Low | Grade 1 | Not related |
| B | 12 | Alkaline phosphatase | Low | Grade 1 | Not related |
| A | 4 | Hemoglobin | Low | Grade 2 | Not related (related to study procedure) |
| A | 7 | Hemoglobin | Low | Grade 1 | Not related |
| A | 12 | Hemoglobin | Low | Grade 3 | Not related (related to study procedure) |
| D | 12 | Alkaline phosphatase | Low | Grade 1 | Not related |
| A | 4 | Total bilirubin (with normal ALT) | High | Grade 1 | Not related |
| D | **4** | **Platelet count** | **Low** | **Grade 1** | **RELATED** |
| D | **4** | **ALT** | **High** | **Grade 2** | **RELATED** |
| D | 12 | Alkaline phosphatase | Low | Grade 1 | Not related |
| B | 4 | WBC count | Low | Grade 1 | Not related |
| A | 7 | Hemoglobin | Low | Grade 1 | Not related (related to study procedure) |
| A | 7 | Alkaline phosphatase | Low | Grade 1 | Not related |
| A | 12 | Hemoglobin | Low | Grade 1 | Not related (related to study procedure) |
| D | 4 | Hemoglobin | Low | Grade 1 | Not related (related to study procedure) |
| D | **4** | **ALT** | **High** | **Grade 1** | **RELATED** |
| C | **4** | **WBC count** | **Low** | **Grade 1** | **RELATED** |
| C | 7 | Alkaline phosphatase | Low | Grade 1 | Not related |
| C | 12 | Alkaline phosphatase | Low | Grade 1 | Not related |
| B | 4 | Platelet count | High | Grade 1 | Not related |
| C | 12 | Alkaline phosphatase | Low | Grade 1 | Not related |
| B | 12 | Hemoglobin | Low | Grade 1 | Not related |
| B | **4** | **Alkaline phosphatase** | **High** | **Grade 1** | **RELATED** |
| C | 4 | Alkaline phosphatase | Low | Grade 1 | Not related |
| C | 12 | Alkaline phosphatase | Low | Grade 1 | Not related |
| E | 4 | Alkaline phosphatase | Low | Grade 1 | Not related |
| E | **4** | **WBC count** | **Low** | **Grade 1** | **RELATED** |
| C | 4 | Alkaline phosphatase | Low | Grade 1 | Not related |
| C | 4 | Alkaline phosphatase | Low | Grade 1 | Not related |
| C | 12 | Alkaline phosphatase | Low | Grade 1 | Not related |
| C | 4 | Hemoglobin | Low | Grade 1 | Not related |
| C | 7 | Hemoglobin | Low | Grade 1 | Not related |
| C | 12 | Hemoglobin | Low | Grade 3 | Not related (related to study procedure) |
| E | **4** | **Alkaline phosphatase** | **Low** | **Grade 1** | **RELATED** |

*Relative to reference range. Bold font indicates events deemed related to study vaccine by the blinded investigator. Low hemoglobin values related to study procedures were attributed to study phlebotomy by the blinded investigator.

**Supplemental Table 5. Intramuscular H5N1 IIV safety endpoints by group**

| **Vaccine allocation** | **Group A** | **Group B** | **Group C** | **Group D** | **Group E** |
| --- | --- | --- | --- | --- | --- |
| Day 1 and 29 | Low-Dose rH5-NE  (clade 2.1) | Med-Dose rH5-NE  (clade 2.1) | High-Dose rH5-NE  (clade 2.1) | Unadjuvanted rH5  (clade 2.1) | Placebo |
| Day 197 | H5N1 IIV (clade 1) | H5N1 IIV (clade 1) | H5N1 IIV (clade 1) | H5N1 IIV (clade 1) | H5N1 IIV (clade 1) |
| Participants, n= | 8 | 8 | 8 | 7 | 6 |
| Participants reporting solicited or unsolicited adverse events within 30 minutes of intramuscular vaccination, |  |  |  |  |  |
| Any events, n (%) | 1 (12.5%) | 3 (37.5%) | 5 (62.5%) | 2 (28.6%) | 2 (33.3%) |
| Any Grade 2 events, n (%) | 1 (12.5%) | 1 (12.5%) | 0 (0.0%) | 1 (14.3%) | 0 (0.0%) |
| Participants reporting solicited or unsolicited adverse events within seven days of intramuscular vaccination (including events within 30 minutes) |  |  |  |  |  |
| Any events, n (%) | 4 (50.0%) | 5 (62.5%) | 7 (87.5%) | 4 (57.1%) | 4 (66.7%) |
| Any Grade 2, n (%) | 1 (12.5%) | 2 (25.0%) | 0 (0.0%) | 1 (14.3%) | 0 (0.0%) |
| Participants reporting unsolicited adverse events within 28 days of intramuscular vaccination |  |  |  |  |  |
| Any events, n (%) | 0 (0.0%) | 1 (12.5%) | 1 (12.5%) | 0 (0.0%) | 1 (16.7%) |
| Any Grade 2 or higher events, n (%) | 0 (0.0%) | 1 (12.5%) | 1 (12.5%) | 0 (0.0%) | 0 (0.0%) |
| Participants with medically attended adverse events within 28 days of intramuscular vaccination |  |  |  |  |  |
| Any medically attended events, n (%) | 0 (0.0%) | 0 (0.0%) | 1 (12.5%) | 0 (0.0%) | 1 (16.7)%) |
| Any Grade 2 events, n (%) | 0 (0.0%) | 0 (0.0%) | 1 (12.5%) | 0 (0.0%) | 0 (0.0%) |
| Participants with laboratory abnormalities within seven days of intramuscular vaccination |  |  |  |  |  |
| Any laboratory abnormality, n (%) | 3 (37.5%) | 3 (37.5%) | 5 (62.5%) | 2 (28.6%) | 2 (33.3%) |
| Any Grade 2 or higher laboratory abnormality, n (%) | 1 (12.5%) | 0 (0.0%) | 1 (12.5%) | 0 (0.0%) | 0 (0.0%) |

Adverse event severity grading was based on standardized assessments recommended by the FDA. Event severity was assessed as either Grade 1 (mild), Grade 2 (moderate), Grade 3 (severe), or Grade 4 (life threatening). There were no solicited or unsolicited adverse events of severity Grade 3 or higher within seven days of intramuscular vaccination, no unsolicited adverse events or medically attended events of severity Grade 3 or higher within 28 days of intramuscular vaccination, and two laboratory abnormalities of severity Grade 3 or higher within seven days of intramuscular vaccination.

**Supplemental Table 6. Potentially immune-mediated medical conditions,** **new onset chronic medical conditions, and serious adverse events by group**

| **Vaccine allocation** | **Group A** | **Group B** | **Group C** | **Group D** | **Group E** |
| --- | --- | --- | --- | --- | --- |
| Day 1 and 29 | Low-Dose rH5-NE  (clade 2.1) | Med-Dose rH5-NE  (clade 2.1) | High-Dose rH5-NE  (clade 2.1) | Unadjuvanted rH5  (clade 2.1) | Placebo |
| Day 197 | H5N1 IIV (clade 1) | H5N1 IIV (clade 1) | H5N1 IIV (clade 1) | H5N1 IIV (clade 1) | H5N1 IIV (clade 1) |
| Participants, n= | 8 | 8 | 8 | 8 | 8 |
| Participants with potential immune-mediated medical conditions, n (%) | 0 (0.0%) | 0 (0.0%) | 0 (0.0%) | 0 (0.0%) | 0 (0.0%) |
| Participants with new onset chronic medical conditions, n (%) | 0 (0.0%) | 0 (0.0%) | 0 (0.0%) | 0 (0.0%) | 0 (0.0%) |
| Participants with serious adverse events , n (%) | 0 (0.0%) | 0 (0.0%) | 0 (0.0%) | 0 (0.0%) | 0 (0.0%) |

Potential immune-mediated medical conditions, new onset chronic medical conditions, and serious adverse events were monitored from enrollment through the last study visit (Day 393).
